# Supplementary material
Source: publisher site journal article supplement (https://www.dovepress.com/article/319561)
Supplement: Supplementary file 1 [file get_supplementary_file.php]

**
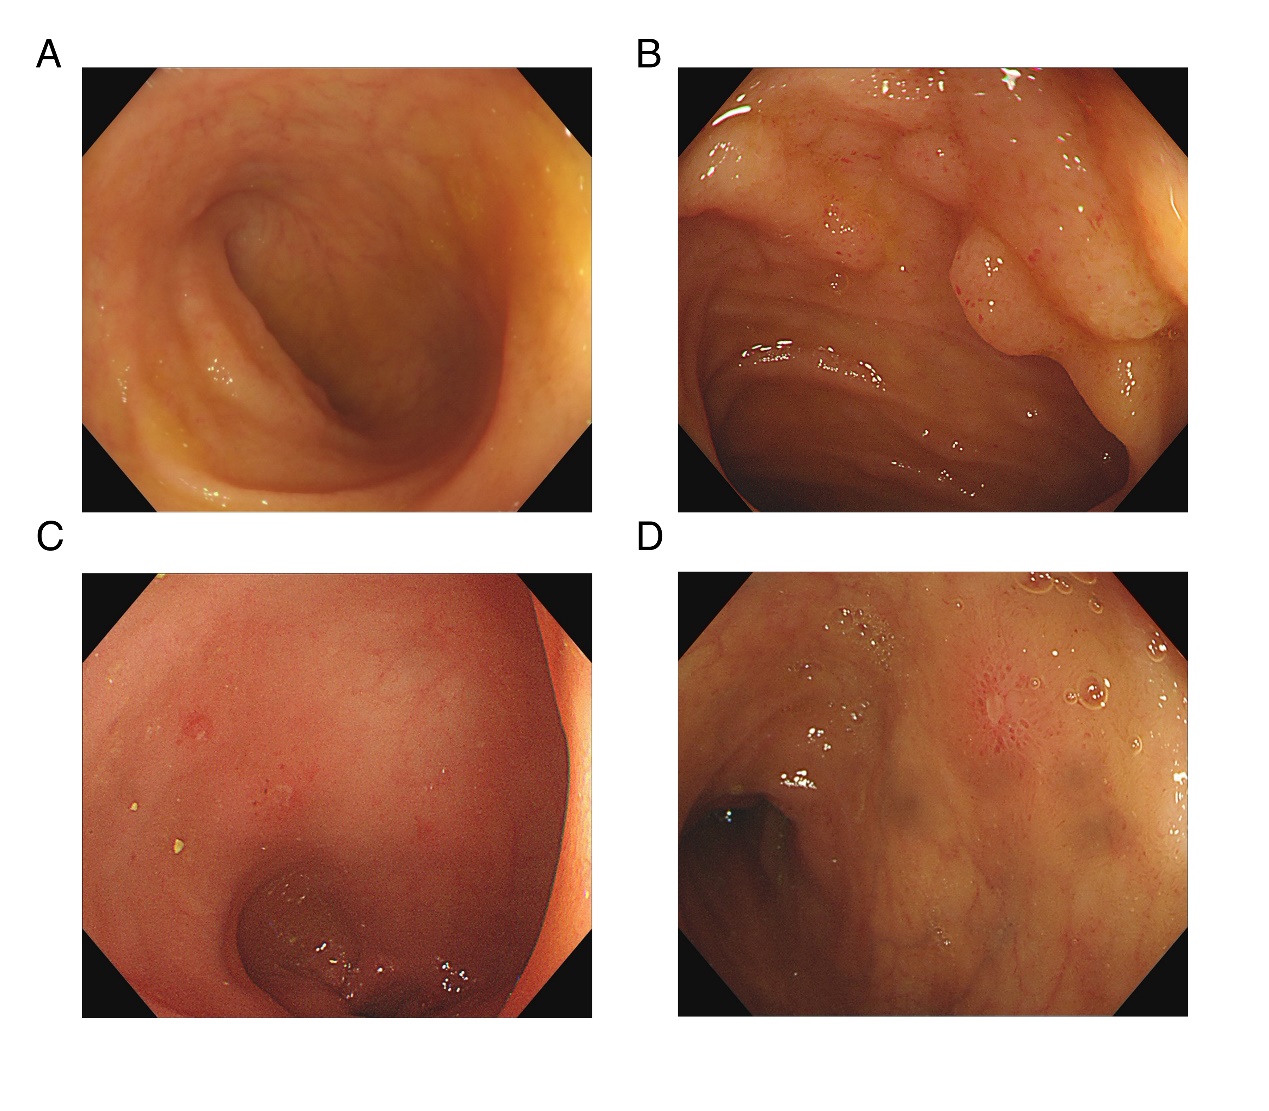
Supplementary Figure S1. Endoscopy images of UITI**

**(A) Normal mucosa of the ileum terminal.**

**(B) TI presenting congestion and edema.**

**(C) TI presenting erosions.**

**(D) TI presenting ulcers.**
